# Supplementary material
Source: PubMed Central journal article supplement (PMC4047386)

Supplemental Figure 1

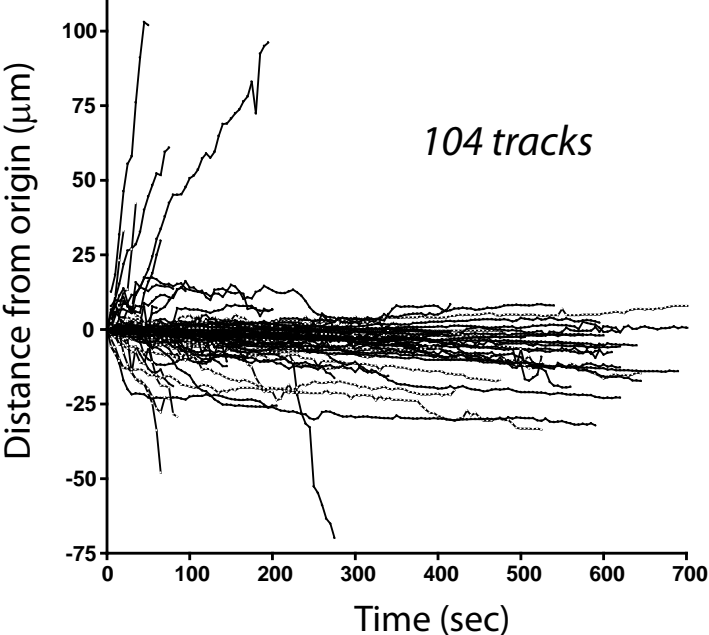

# Supplemental Figure 2

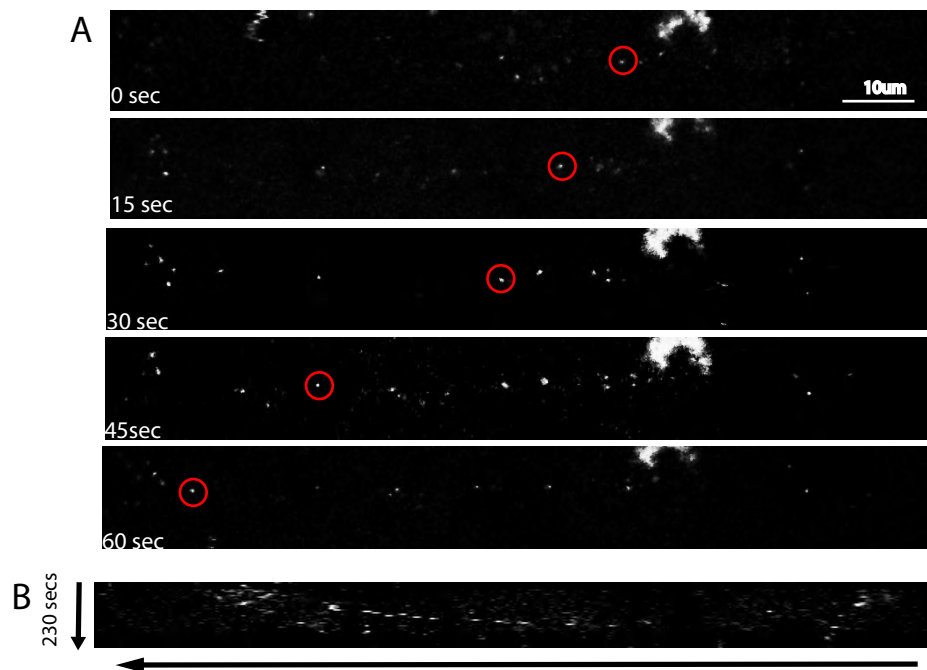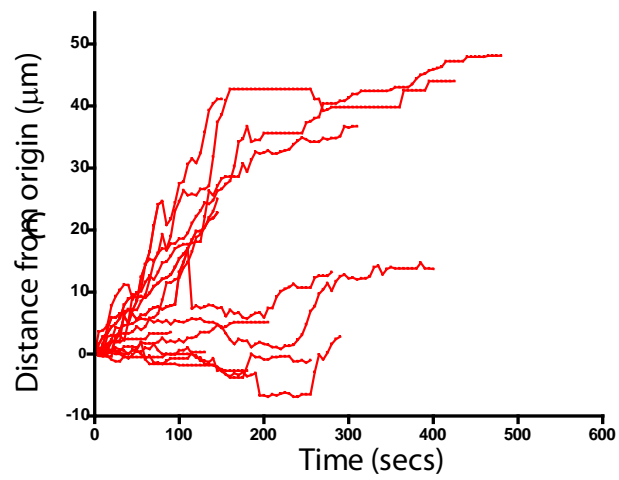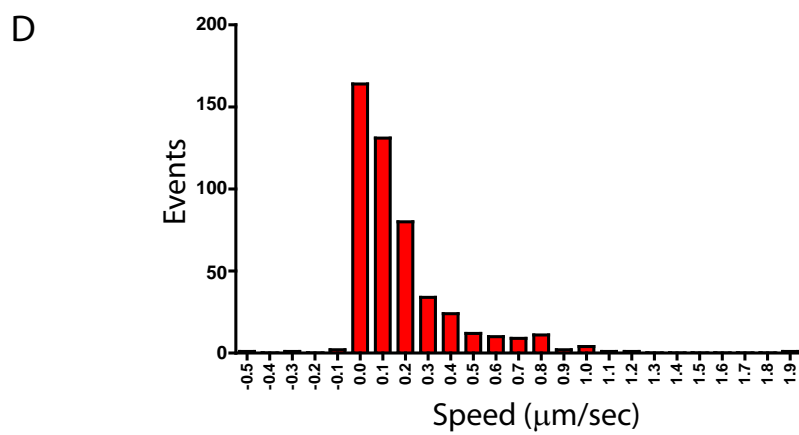

# Supplemental Figure 3

A

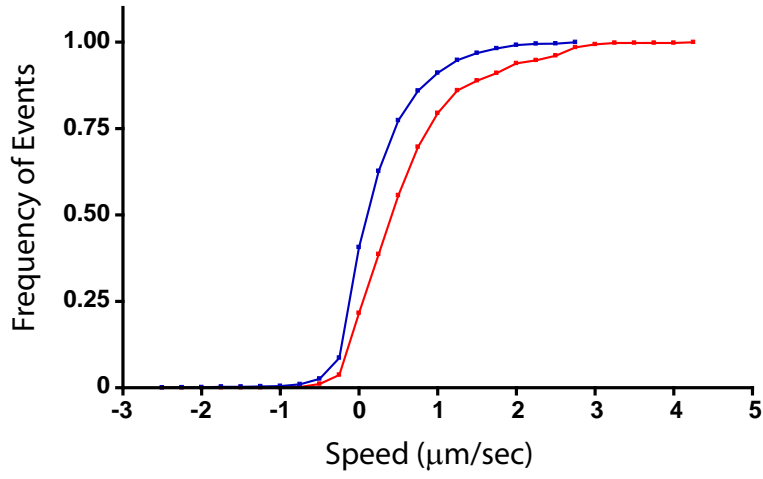

B

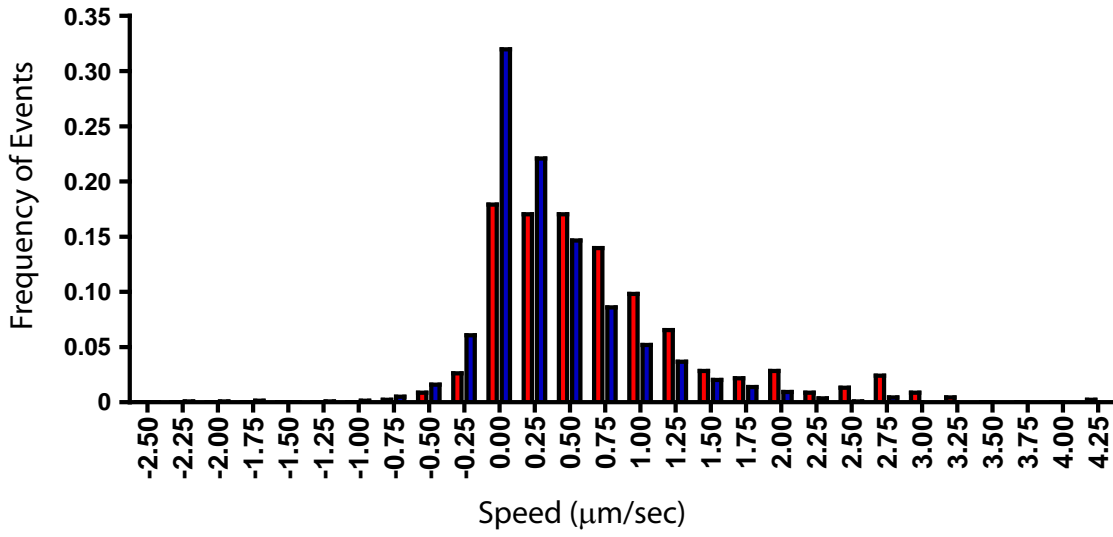

# Supplemental Figure 4

A

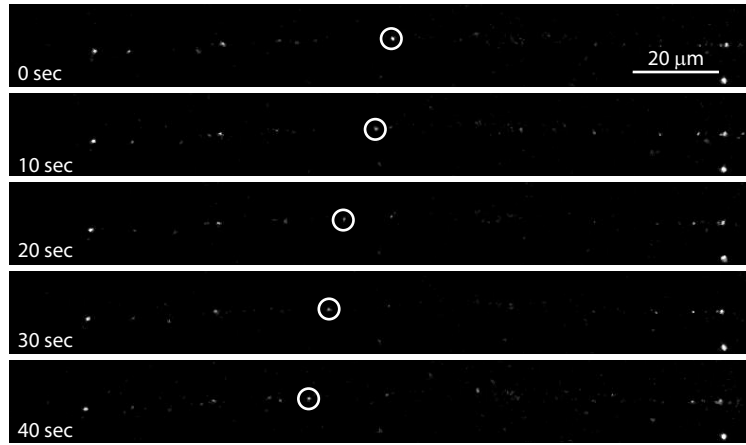

B

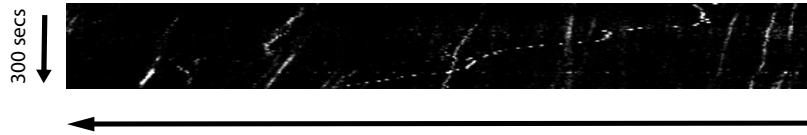

C

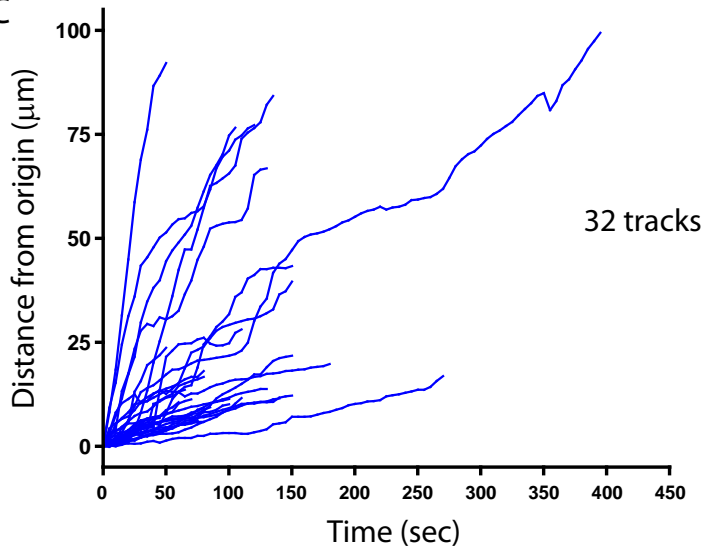

D

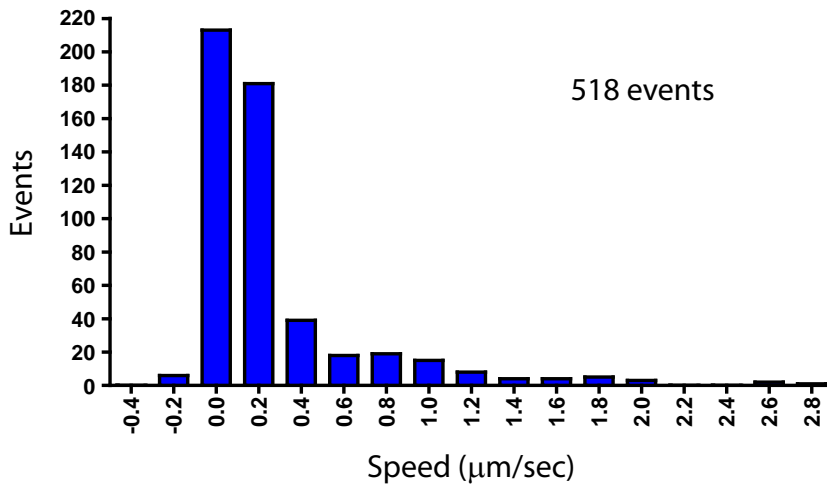

Supplemental Figure 5

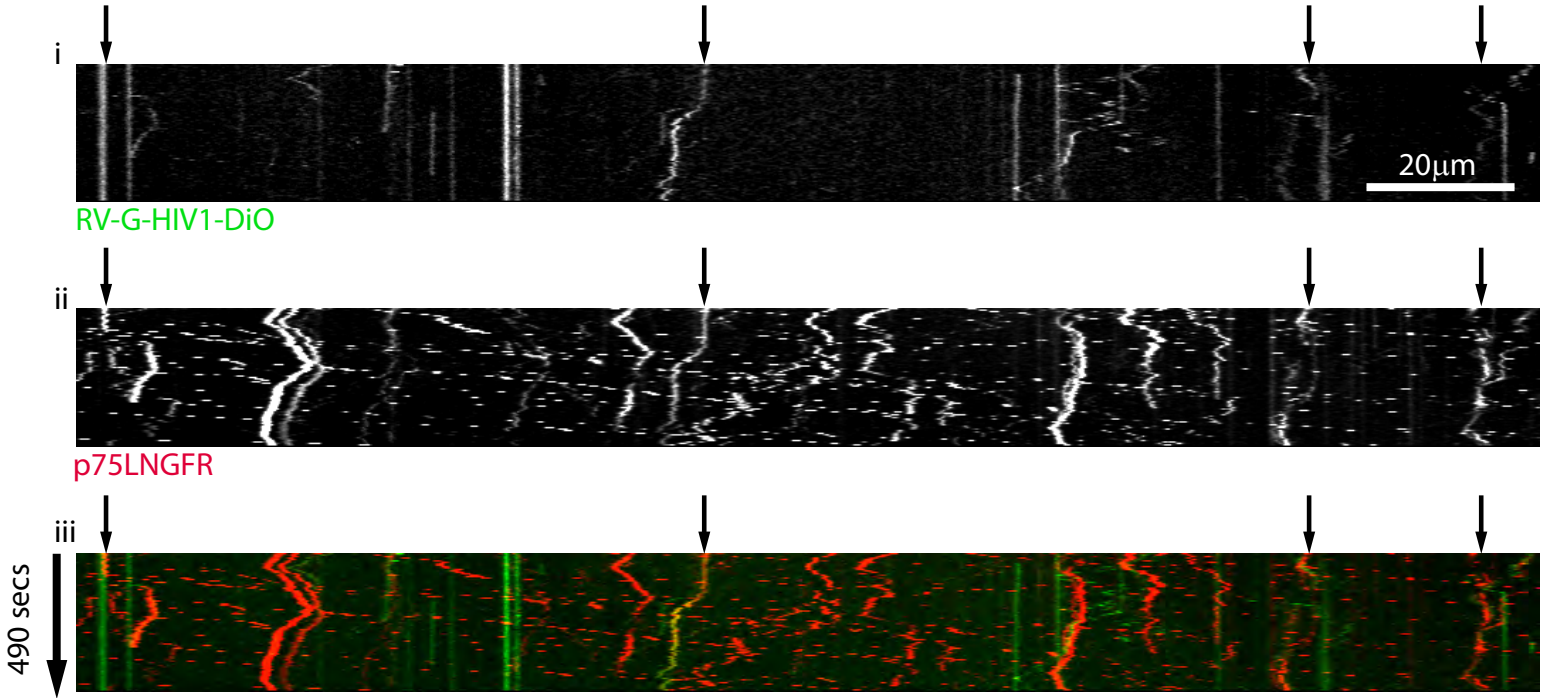

Supplemental figure 6- Bungarotoxin trafficking

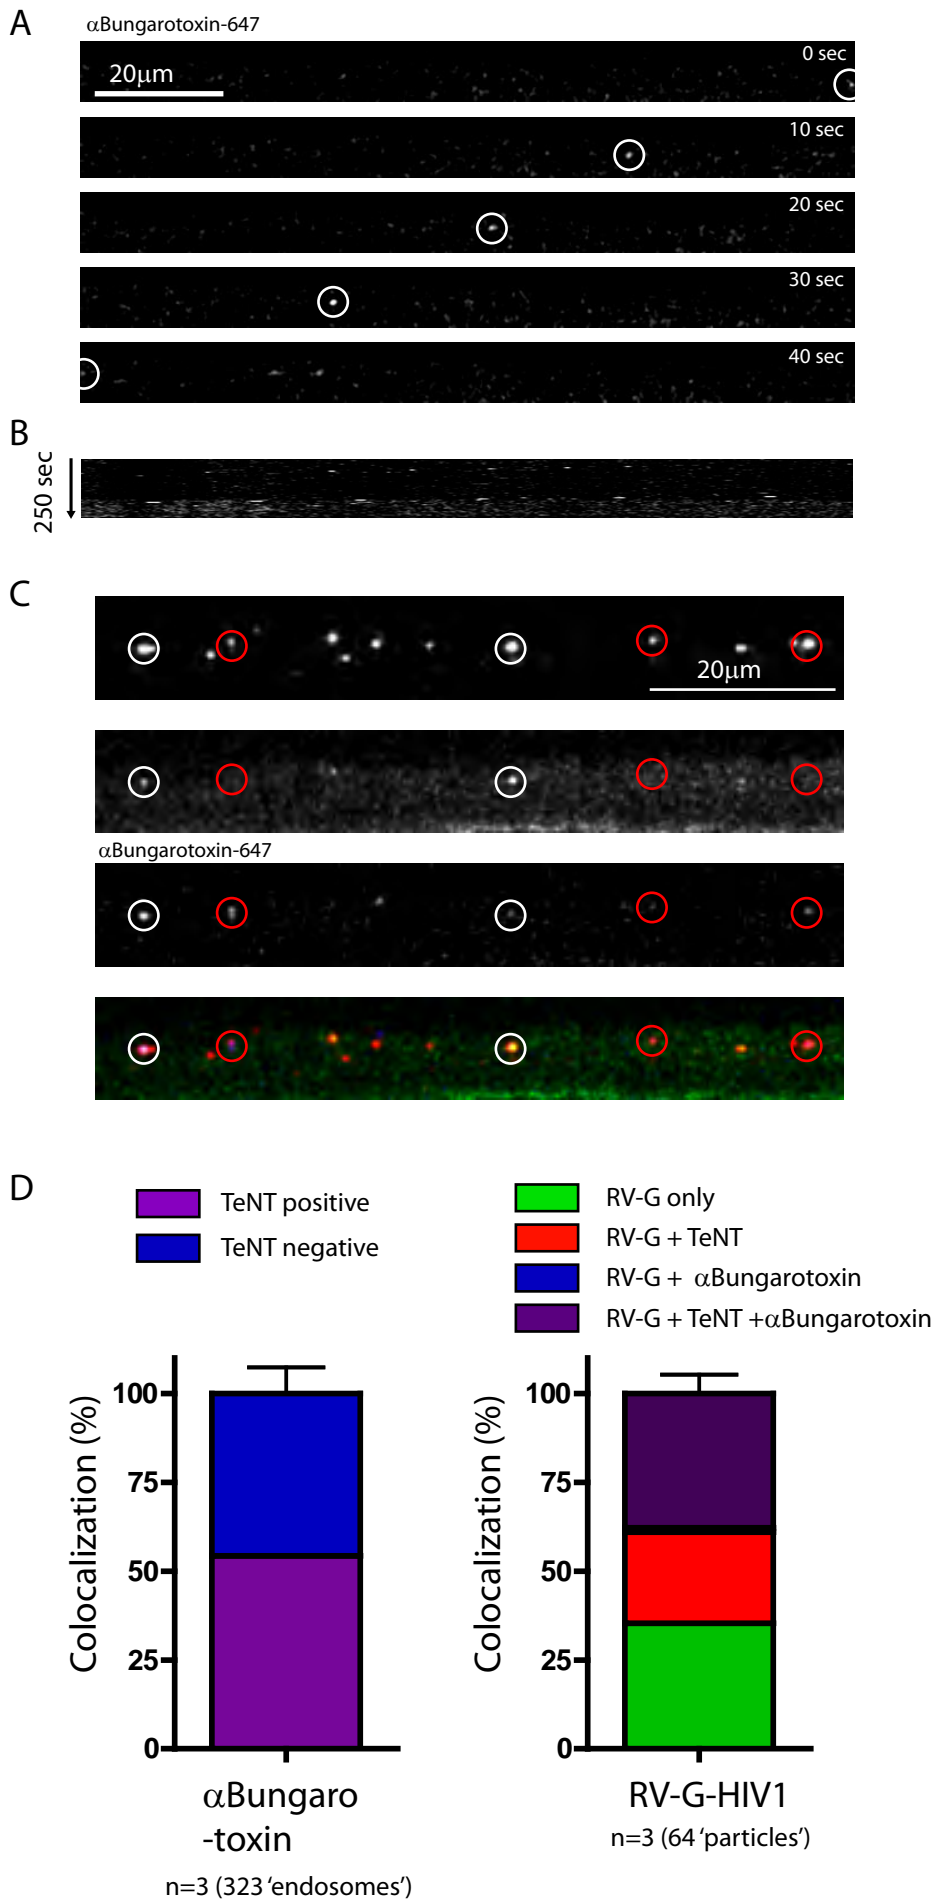

# Supplemental figure 7

A

Somatic Chamber transduction

RV-G-HIV1-DiD

RV-G-HIV1-non-labelled

anti-SMI32-594

anti-GFP-488

anti-SMI32-594

anti-GFP-488

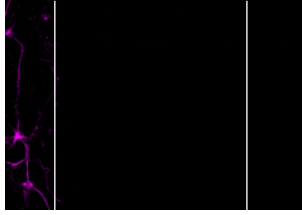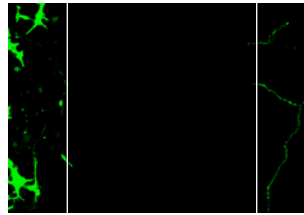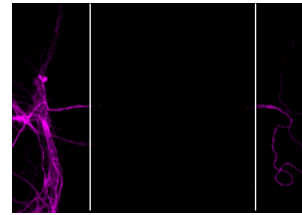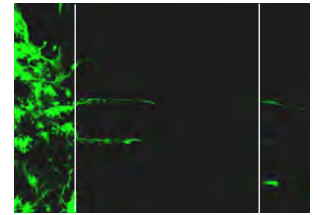

Merge

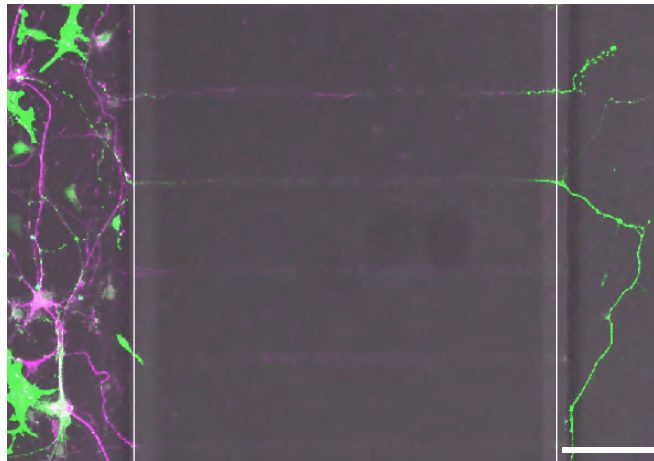

Merge

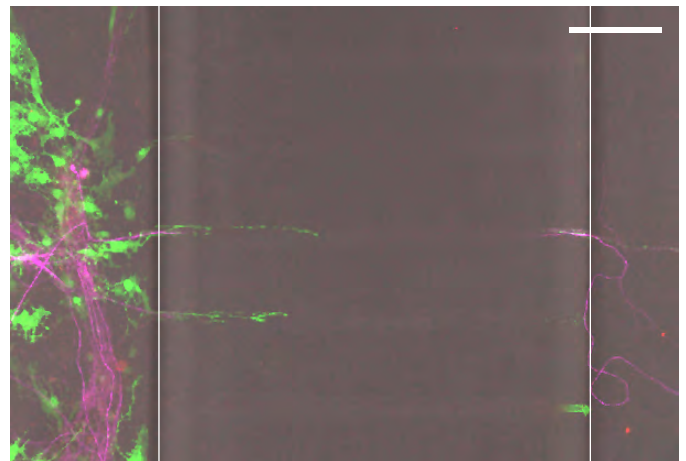

B

Axonal Chamber transduction

RV-G-HIV1-DiD

RV-G-HIV1-non-labelled

anti-SMI32-594

anti-GFP-488

anti-SMI32-594

anti-GFP-488

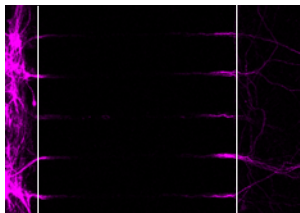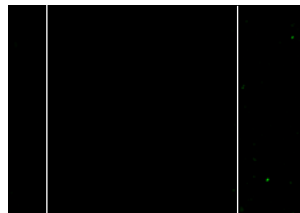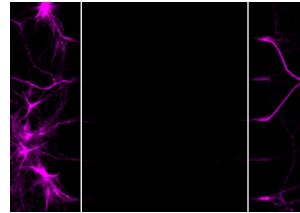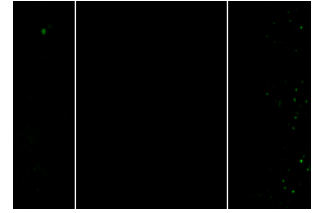

Merge

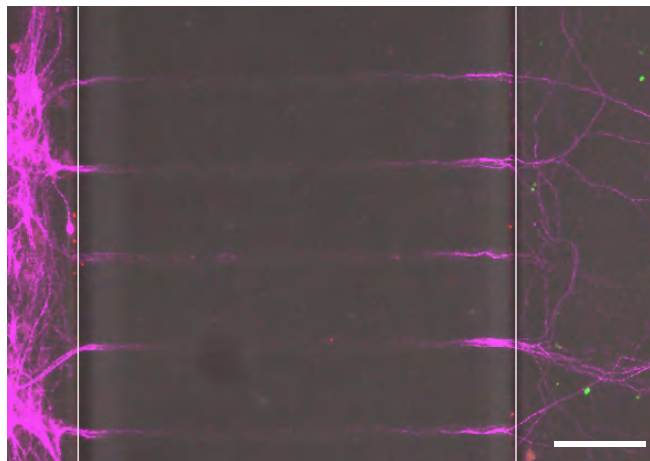

Merge

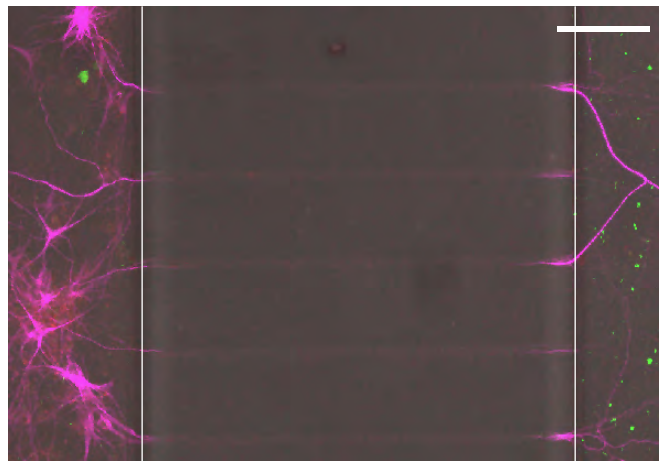

Supplemental figure 8

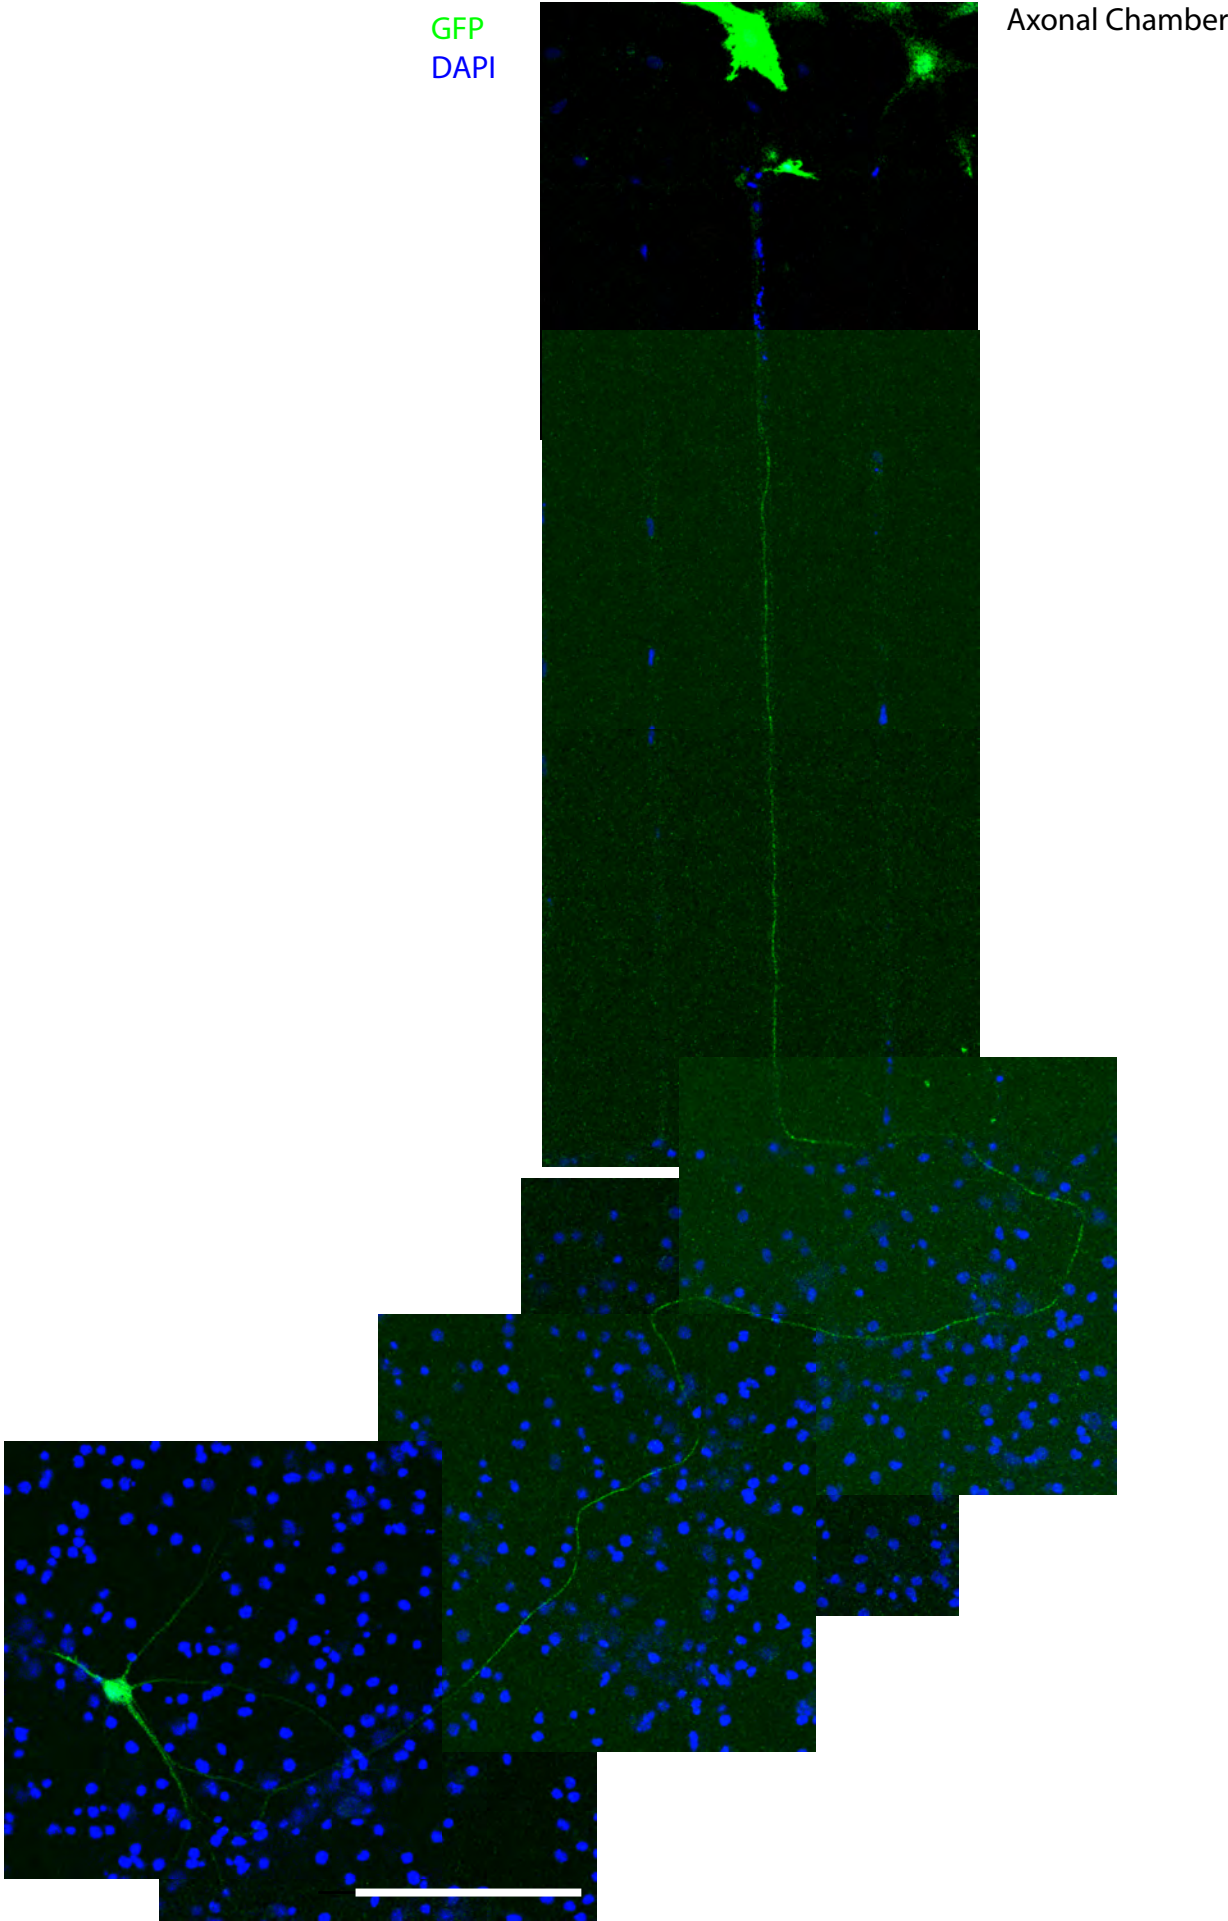



Supplemental figure 9

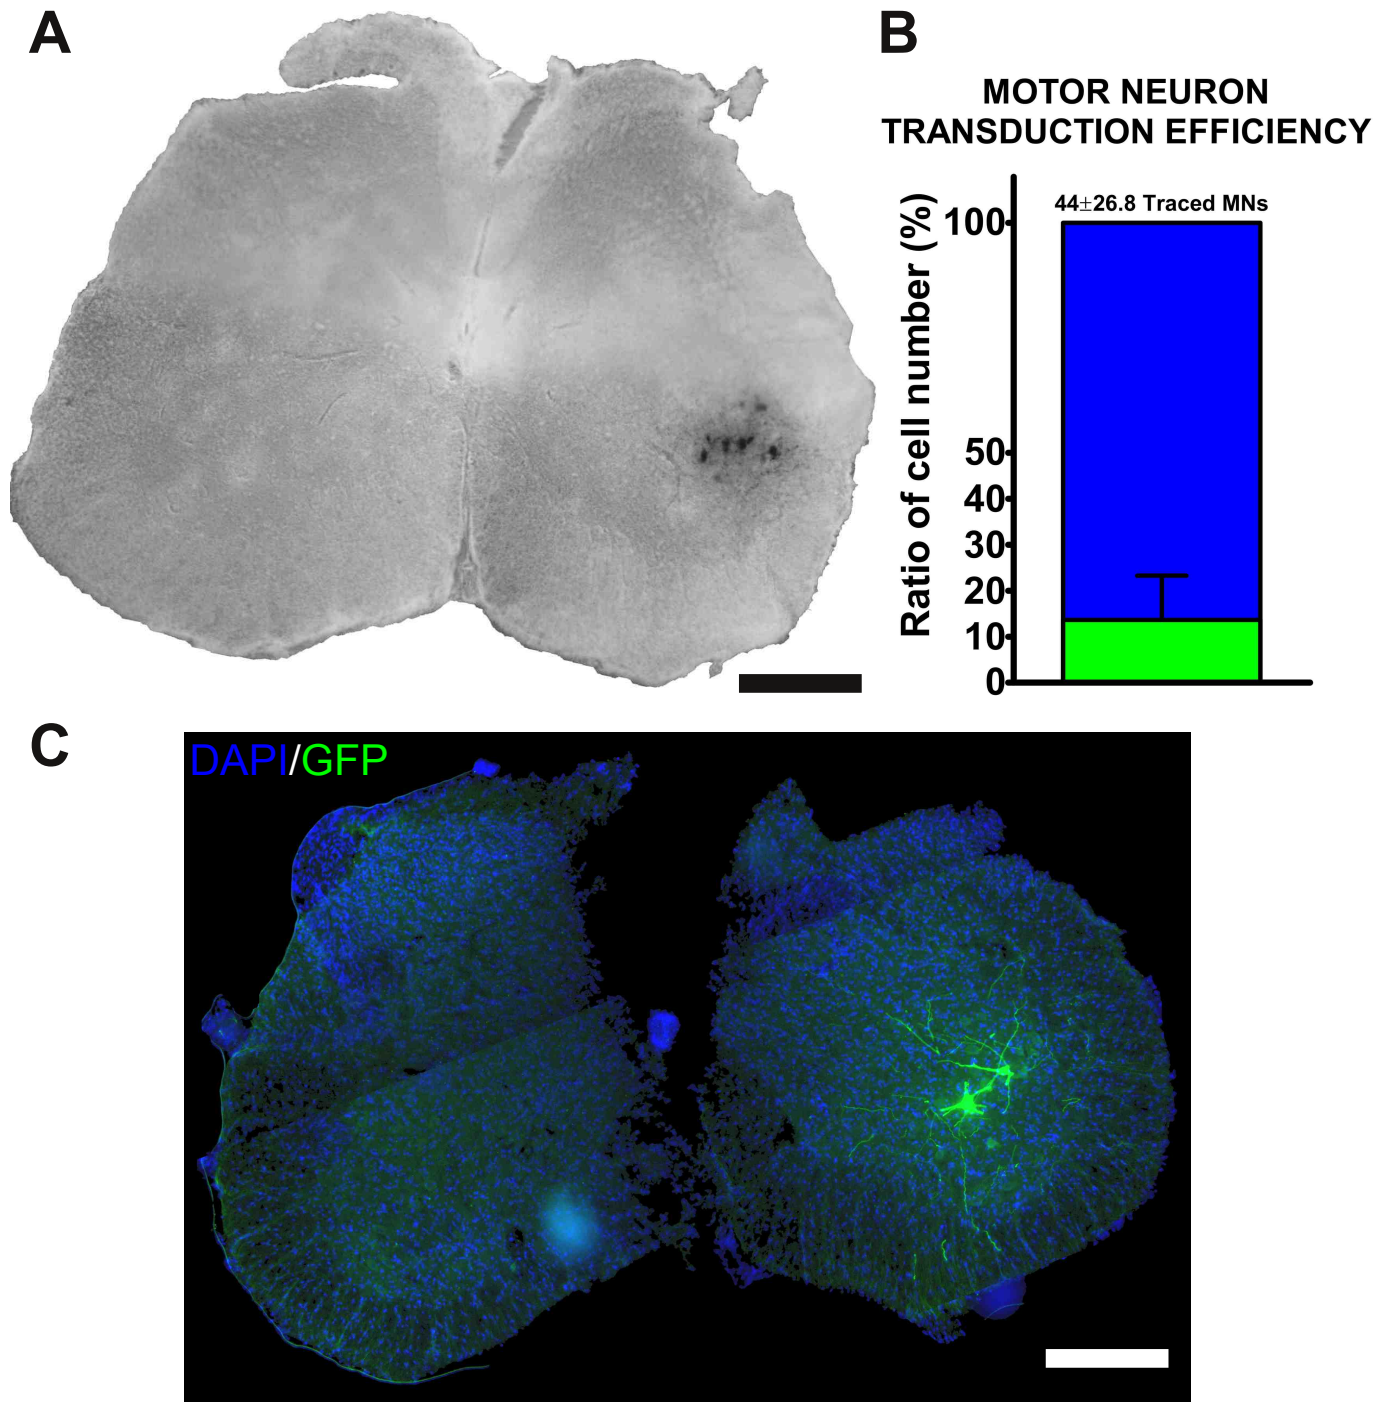

Supplement: supp_M114.549980_Supplemental_figures_post_review.pdf [file supp_M114.549980_Supplemental_figures_post_review.pdf]
